# Supplementary material for: Recombinant BCG-Prime and DNA-Boost Immunization Confers Mice with Enhanced Protection against Mycobacterium kansasii
Source: MDPI journal article supplement (doi:10.3390/vaccines9111260), 2021-11-01
Supplement: s1 [file s1]

Supplent Fig. S1

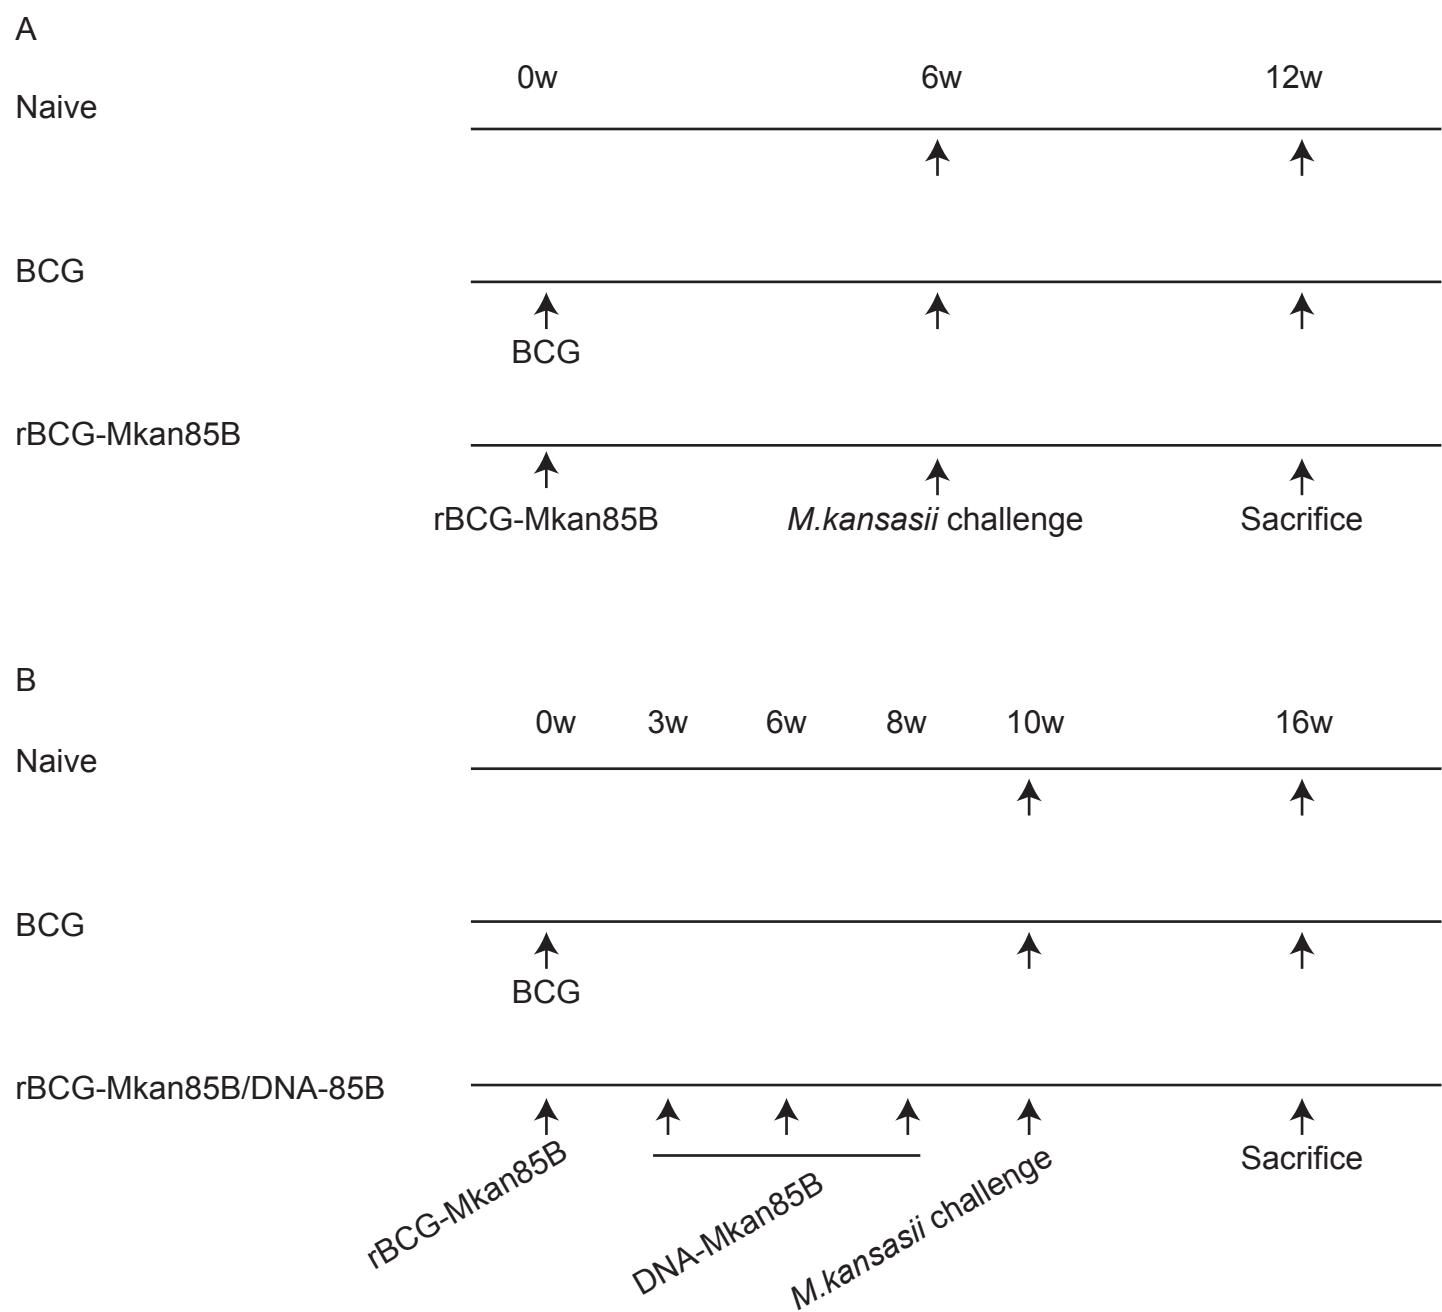

Supplemental Figure S1. Immunization schedule.

(A) CB6F1 (H2b/d) mice were immunized with the BCG vaccine or rBCG-Mkan85B at a concentration of  $4 \times 10^6$  CFU or 0.1 mg of bacilli i.d. for 6 weeks, followed by nasal exposure to virulent *M. kansasii* strain infection for another 6 weeks. (B) CB6F1 (H2b/d) mice were immunized with the BCG vaccine or rBCG-Mkan85B at a concentration of  $4 \times 10^6$  CFU or 0.1 mg of bacilli i.d. and 100  $\mu$ g of plasmid DNA in saline i.m. three times. Two weeks after the final DNA-Mkan85B immunization, the mice were infected with *M. kansasii*.

Supplement Fig. S2

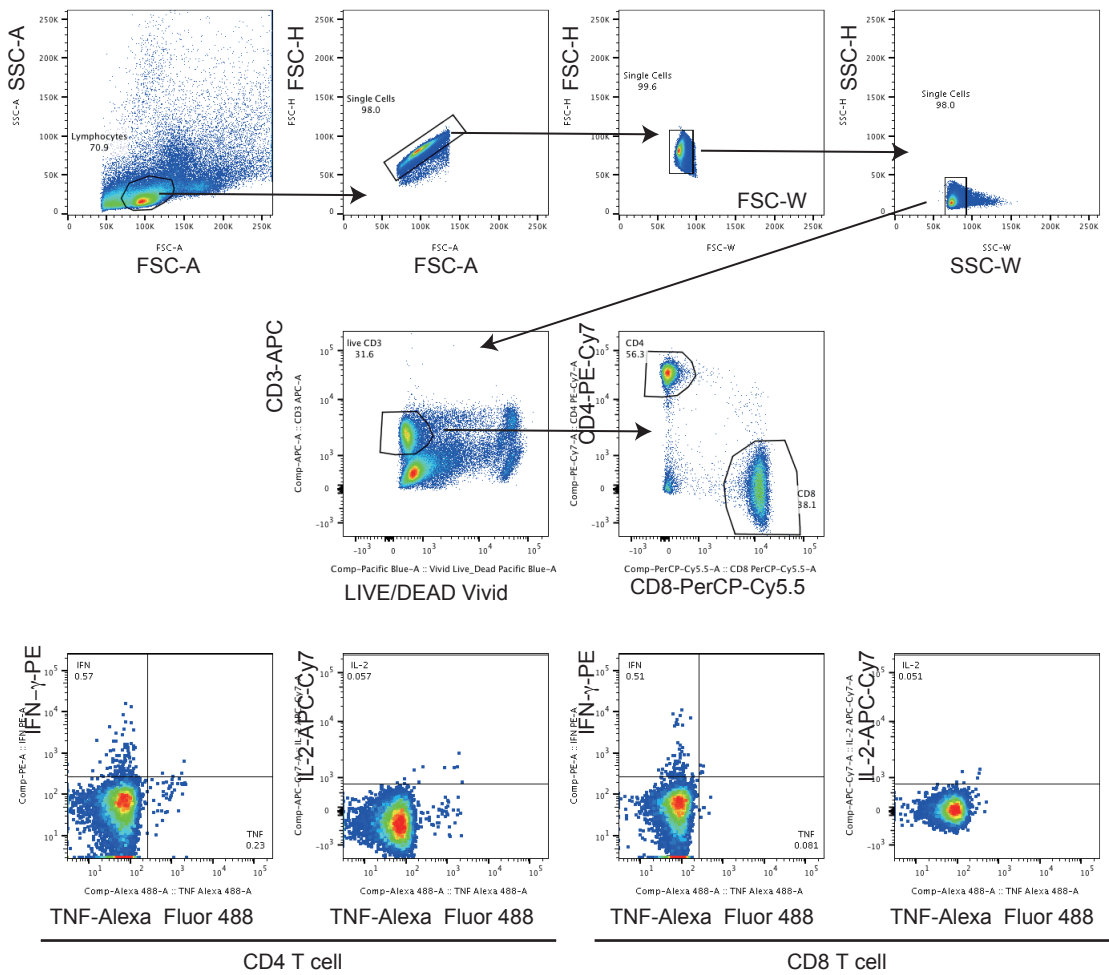

Supplemental Figure S2. Gating tree for functional characterization of distinct populations of responding CD4<sup>+</sup> or CD8<sup>+</sup> T cells using polychromatic flow cytometry

The gating strategy used to identify IFN- $\gamma$ <sup>+</sup>, IL-2<sup>+</sup> and TNF-producing CD4<sup>+</sup> and CD8<sup>+</sup> T cells in splenocytes from a representative mouse is shown. The upper 4 panels show the initial gating of total events, including a singlet cell gate, followed by selection for lymphocytes. Live CD3<sup>+</sup> T cells were identified as LIVE/DEAD ViViD-CD3<sup>+</sup> cells. CD8<sup>+</sup> and CD4<sup>+</sup> T cells were further identified by CD8 and CD4 expression patterns. Antigen-specific IFN- $\gamma$ <sup>+</sup>, IL-2<sup>+</sup> and TNF-producing CD4<sup>+</sup> T cells or CD8<sup>+</sup> T cells were gated as shown. The cells producing three, any two and any one cytokine were determined by Boolean combinations. The sum of the three and two cytokine-producing cells was measured as the polyfunctional T cells specific for PPD or the epitope peptides.
